# Supplementary figures and images for: Synergizing sunitinib and radiofrequency ablation to treat hepatocellular cancer by triggering the antitumor immune response
Source: PubMed Central journal article supplement — J Immunother Cancer. 2020 Oct 28;8(2):e001038. doi: 10.1136/jitc-2020-001038 (PMC7594543; doi:10.1136/jitc-2020-001038), 2020-10-28

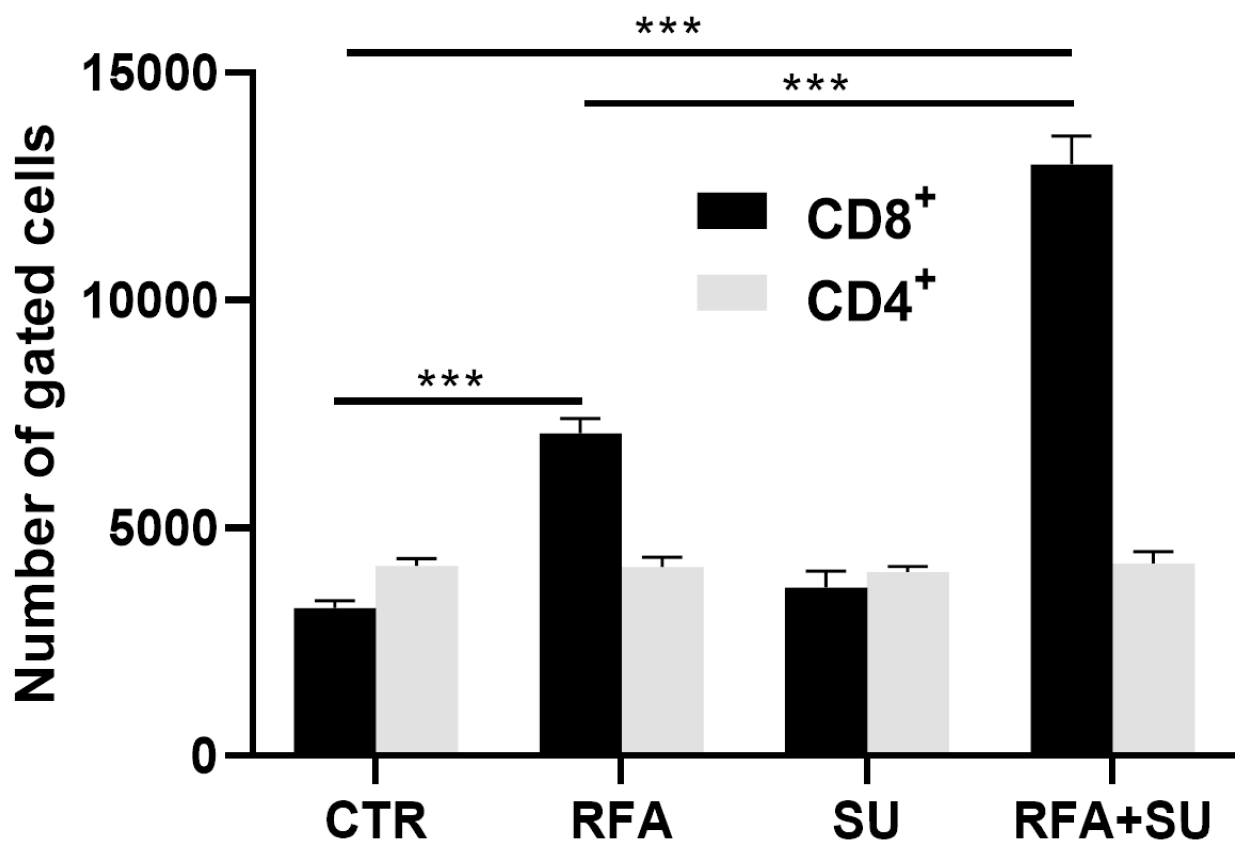

Supplement: jitc-2020-001038supp002.pdf [file jitc-2020-001038supp002.pdf]

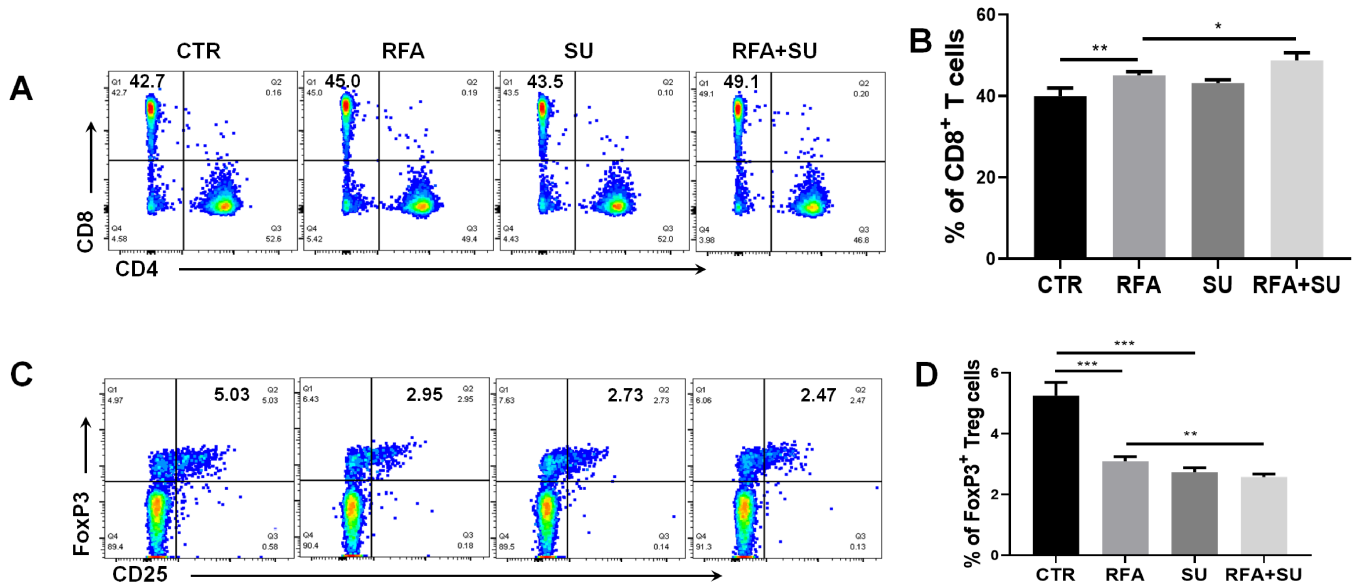

Supplement: jitc-2020-001038supp003.pdf [file jitc-2020-001038supp003.pdf]

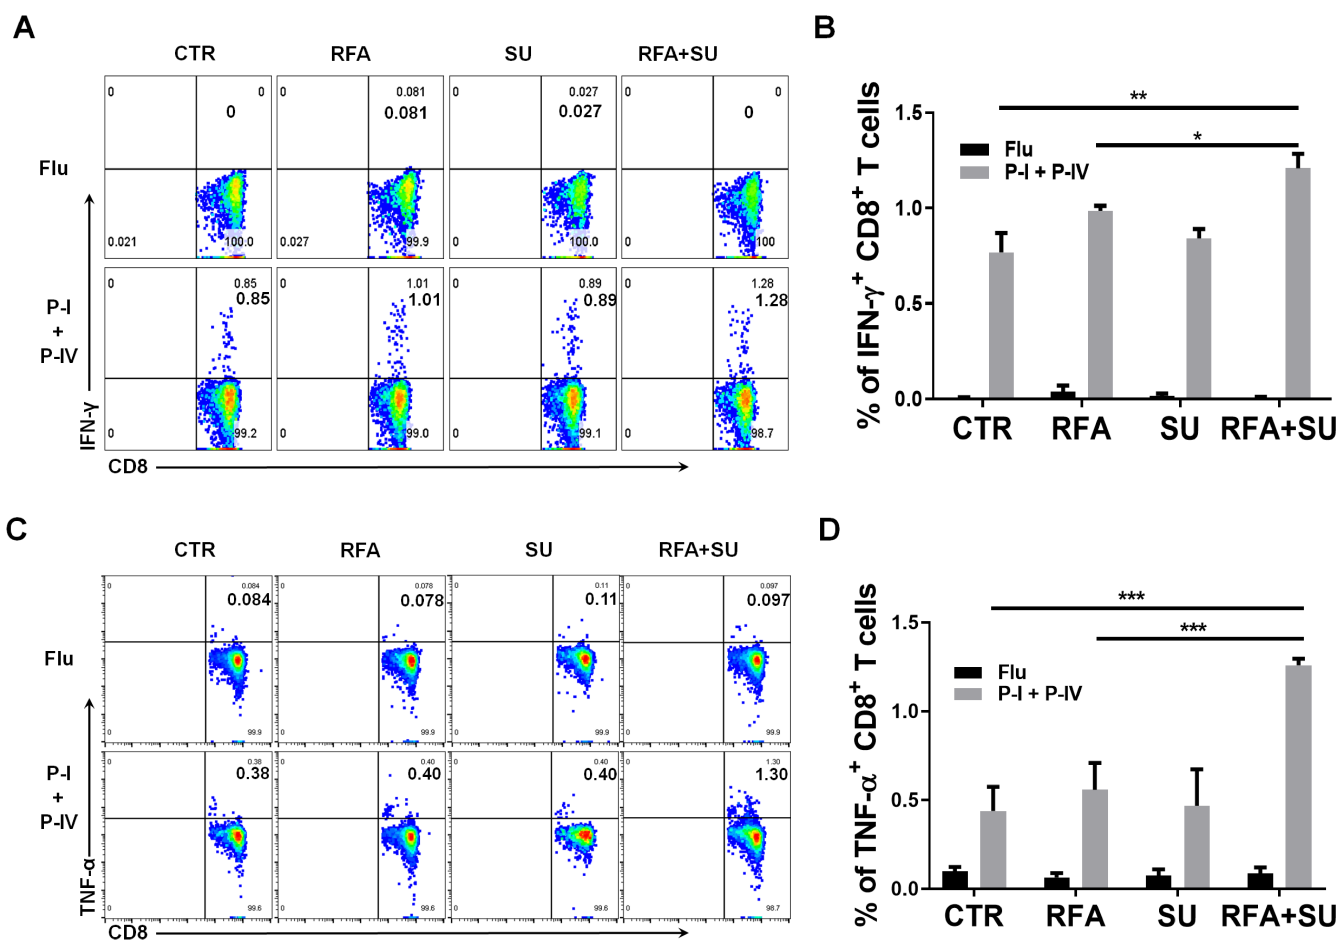

Supplement: jitc-2020-001038supp004.pdf [file jitc-2020-001038supp004.pdf]

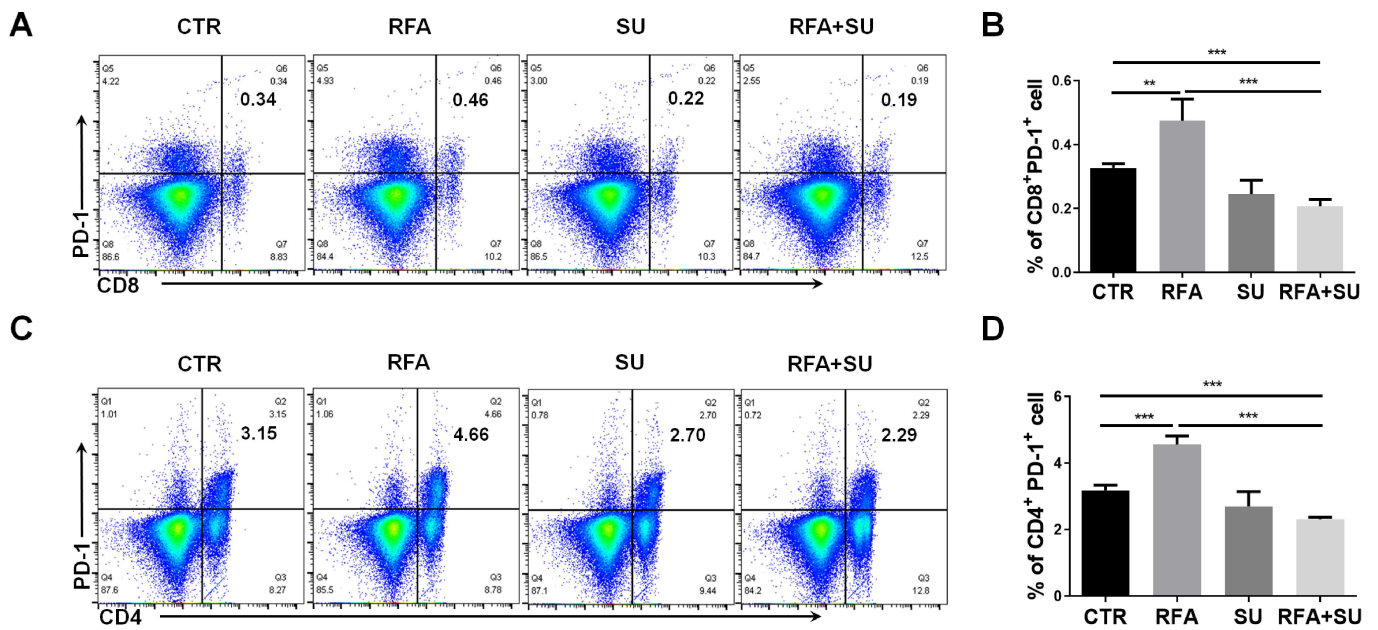

Supplement: jitc-2020-001038supp005.pdf [file jitc-2020-001038supp005.pdf]
